# Supplementary material for: MAP-RSeq: Mayo Analysis Pipeline for RNA sequencing
Source: PubMed Central journal article supplement (PMC4228501; doi:10.1186/1471-2105-15-224), 2014-06-27
Supplement: 1471-2105-15-224-S1.pdf [file 1471-2105-15-224-S1.pdf]

# Summary report from the MAP-RSeq workflow . Report in .html format which summarizes the study design, alignment and expression statistics per sample, links to pre- and post-QC plots as well as to the resulting files on gene and exon expression, fusion transcripts and SNVs identified per sample.

BBB Mayo BIC PI Support BBB

## Contents

- 1 Project Title
- 2 Initial Meetings and Timeline
- 3 Project Description
  - 3.1 Goals of the project
- 4 Analysis plan
- 5 Received Data
  - 5.1 Sample Summary
- 6 Results Summary
  - 6.1 QC steps
  - 6.2 Statistics based on per sample analysis
- 7 Appendix

## I. Project Title :

NGS Bioinformatics for mmaseq sequencing

## II. Project Description

### 1. Background

| ITEM                         | DESCRIPTION |
|------------------------------|-------------|
| Disease Type                 | Cancer      |
| Number of Samples            | 2           |
| Read Length                  | 50          |
| PairedEnd(PE)/SingleRead(SR) | PE          |
| Genome Build (hg18/hg19)     | hg19        |
| StartDate                    | 06/12/2013  |
| EndDate                      | 06/14/2013  |

### 2. Study design

- **What are the samples?**  
This section includes all information available from the investigator about the samples
- **Goals of the project**  
This section includes specific goals set by the investigator for the project

## III. Analysis Plan

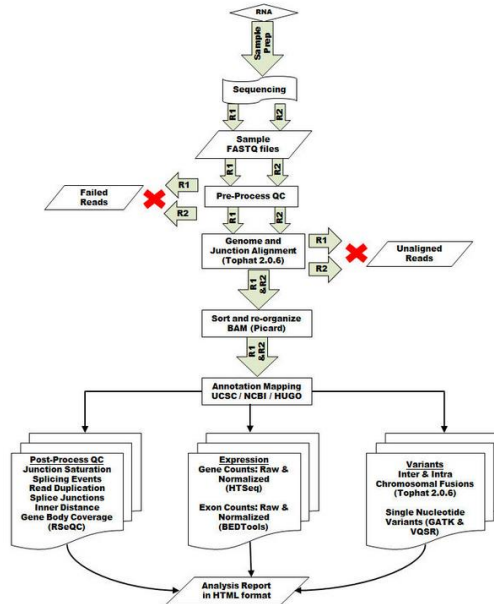

## IV. Received Data

- **Run Name**  
130605\_SN7001122\_0123\_BH0BEKADXX
- **Sample Summary**

| LANE | INDEX | SAMPLE NAMES |
|------|-------|--------------|
| 1    | -     | S_AB         |
| 2    | -     | S_CD         |

[ TOP ]

[ TOP ]

## V. Results Summary:

- QC steps - FastQC-report**

FastQC aims to provide a simple way to do some quality control checks on raw sequence data coming from high throughput sequencing pipelines. It provides a modular set of analyses which you can use to give a quick impression of whether your data has any problems of which you should be aware before doing any further analysis.  
[FastQC Reports](#)

- Statistics based on per Sample Analysis (ColumnDescription)**

Analysis is carried out using fastq sequence files as input and generates output tables. For paired-end runs, the tables contain counts for each sample combined from both reads.

| SAMPLE(S) | TOTAL READS | USED READS  | MAPPED READS       | MAPPED READS (GENOME) | MAPPED READS (JUNCTION) | GENE COUNT         | EXON COUNT  | SNVS IDENTIFIED |
|-----------|-------------|-------------|--------------------|-----------------------|-------------------------|--------------------|-------------|-----------------|
| s_AB      | 294,030,280 | 282,256,623 | 262,321,294 (89.2) | 236,598,852 (80.5)    | 25,722,442 (8.7)        | 163,745,488 (55.7) | 185,350,787 | 292,827         |
| s_CD      | 367,467,944 | 366,429,975 | 350,734,057 (95.4) | 316,656,109 (86.2)    | 34,077,948 (9.3)        | 195,569,950 (53.2) | 236,985,171 | 383,190         |

## VI. Results Delivered

The following three sets of tables are delivered and column description is available in Appendix.

- Exon table:** contains counts for the number of times an exon has been detected  
count (raw) = sum of exon read counts  
count (RPKM)
- Gene table:** contains counts for the number of times a gene copy has been detected  
count (raw) = sum of exon read counts, with an exception that if reads start in different exons of the same gene twice, these are counted only once for the gene
- SNV reports:** contains Single Nucleotide Variants (SNV) called using GATK software  
sample.gatk.vcf = raw SNV calls for each sample  
sample.filter.vcf = SNV calls annotated using VQSR filters

[ TOP ]

- RSeQC Plots:**

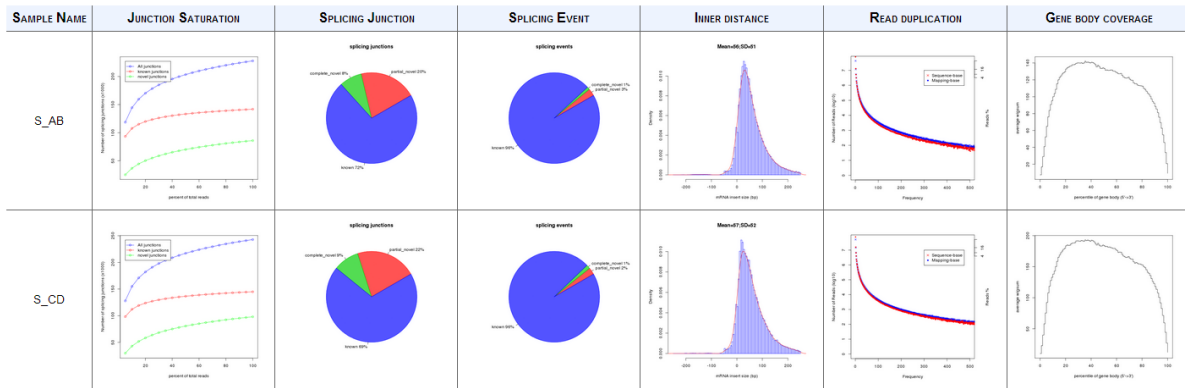

- Tophat fusion (circos plot):**

Tab delimited fusion results are available [here](#)  
 Detail fusion report in HTML format is available [here](#)

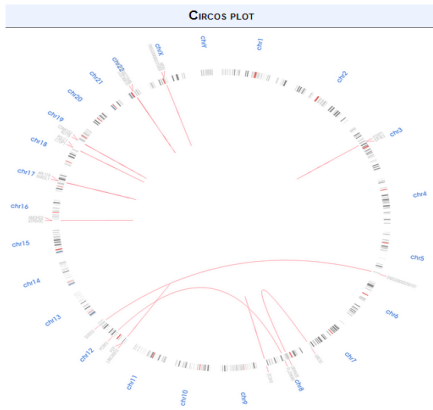

[ TOP ]

- Statistics based on per Sample Analysis are recorded in the tab delimited file Details**

- IGV Visualization**

The SNV and INDEL annotation reports (both standard and filtered) include visualization links to IGV to enable a realistic view of the variants. Please follow steps in the following link to setup IGV (takes less than 5 minutes) and utilize this feature. [IGV setup for variant visualization](#)

## VII. Useful Links

- Tophat 2
- Tophat Fusion
- HTSeq
- RSeQC
- GATK
- UCSC Genome Browser

## VIII. Appendix

Full Length cDNA Sequencing (mRNA- Seq) results delivery format(Appendix)

### Authorship Consideration

Advancing scientific research is a primary motivation of all bioinformaticians and acknowledgment of contribution through authorship on manuscripts arising from this analysis is one way our work is assessed and attributed. We request to be considered for authorship on any manuscripts using the analysis results provided if you believe we have made substantive intellectual contributions to the study.
